# Supplementary material for: The effects of standing desks within the school classroom: A systematic review
Source: PubMed Central journal article supplement — Prev Med Rep. 2016 Apr 9;3:338–47. doi: 10.1016/j.pmedr.2016.03.016 (PMC4929187; doi:10.1016/j.pmedr.2016.03.016), 2016-04-09
Supplement: mmc1.pdf [file mmc1.pdf]

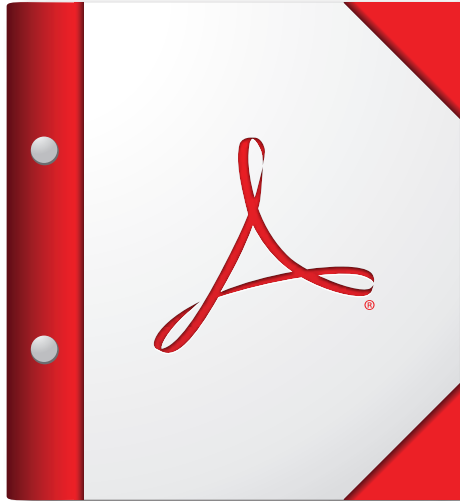

**For the best experience, open this PDF portfolio in  
Acrobat 9 or Adobe Reader 9, or later.**

[Get Adobe Reader Now!](#)
